# Supplementary material for: Development of a Spatial Hydrologic Soil Map Using Spectral Reflectance Band Recognition and a Multiple-Output Artificial Neural Network Model
Source: Copernicus journal article supplement (doi:10.5194/hess-2017-13), 2017-01-23
Supplement: Supplementary file [file hess-2017-13-RC2-supplement.pdf]

# Development of a Spatial Hydrologic Soil Map Using Spectral Reflectance Band Recognition and a Multiple-Output Artificial Neural Network Model

Khamis Naba Sayl<sup>1,3</sup>, Haitham Abdulmohsin Afan<sup>1</sup>, Nur Shazwani Muhammad<sup>1</sup>, Ahmed ElShafie<sup>2</sup>

<sup>1</sup>Department of Civil and Structural Engineering, Faculty of Engineering and Built Environment, Universiti Kebangsaan Malaysia, 43600 UKM Bangi, Selangor Darul Ehsan, Malaysia

<sup>2</sup>Department of Civil Engineering, Faculty of Engineering, University of Malaya, 50603 Kuala Lumpur, Malaysia

<sup>3</sup>Department of Dams and Water Resources, Engineering College, University of Anbar, Ramadi, Iraq

*Correspondence to:* Nur Shazwani Muhammad (shazwani.muhammad@ukm.edu.my)

**Abstract.** Soil type is important in any civil engineering project. Thorough and comprehensive information on soils in both the spatial and temporal domains can assist in sustainable hydrological, environmental and agricultural development. Conventional soil sampling and laboratory analysis are generally time-consuming, costly and limited in their ability to retrieve the temporal and spatial variability, especially in large areas. Remote sensing is able to provide meaningful data, including soil properties, on several spatial scales using spectral reflectance. In this study, a multiple-output artificial neural network model was integrated with geographic information system, remote sensing and survey data to determine the distributions of hydrologic soil groups in the Horan Valley in the Western Desert of Iraq. The model performance was evaluated using seven performance criteria along with the hydrologic soil groups developed by the United States Geological Survey (USGS). On the basis of the performance criteria, the model performed best for predicting the spatial distribution of clay soil, and the predicted soil types agreed well with the soil classifications of the USGS. Most of the samples were categorized as sandy loam, whereas one sample was categorized as loamy sand. The proposed method is reliable for predicting the hydrological soil groups in a study area.

## 1 Introduction

Spatial and temporal information on soil type is important in any civil engineering project in order to ensure sustainable hydrological, environmental and agricultural development. Hydrological processes, including surface runoff and infiltration, depend on the soil texture. Therefore, soil type is important in determining the potential volume of surface runoff and selecting the best type and location of water-harvesting structures (Jasrotia et al. 2009).

Currently, the Soil Conservation Service (SCS) method is used widely in many types of studies to estimate the surface runoff from a certain rainfall event (Senay and Verdin 2004; Winnaar et al. 2007; Tyagi et al. 2008; Elewa and Qaddah 2011). This method is based on the runoff curve number (CN), which is derived from the soil texture and land cover,

36 where soil type is classified into several subcategories. The United States Geological Survey (USGS) has divided  
37 hydrologic soil groups into four classes. Runoff can be estimated using CN from the rainfall amount (Senay and  
38 Verdin 2004). Many hydrological models use CN as input to estimate storm runoff, such as the Soil and Water  
39 Assessment Tool (SWAT) (Neitsch et al. 2011), Environmental Policy Integrated Climate (EPIC) model (Wang et al.  
40 2012) and Agricultural Non-Point Source Pollution (AGNPS) model (Young et al. 1987).

41  
42 The identification of soil type based on laboratory testing is considered to be a traditional method, and it is time-  
43 consuming and costly. Remote sensing (RS) represents one of the best alternatives; it is an accessible method that can  
44 be utilized to provide valuable information related to site evaluation, including site monitoring and soil investigation.  
45 Furthermore, this information can be easily analysed and integrated for site design, environmental impact assessment  
46 and planning for construction activities. RS is capable of providing soil information in a spatial form, which is very  
47 significant in the prediction of soil properties based on various bands of the electromagnetic spectrum.

48  
49 The spectral reflectance characteristics of soils are a function of several important characteristics (Lacoste et al. 2014;  
50 Martin et al. 2014; Wulf et al. 2014). The chemical and physical properties of materials define their spectral reflectance  
51 and emittance spectra, which can be used to identify them. Spectral reflectance refers to the ratio of radiant energy  
52 reflected to the incident energy on a body (Sims and Gamon 2002).

53  
54 The soil reflectance data can be measured under laboratory conditions (i.e. proximal sensing) or in the field (i.e. RS).  
55 The process of measuring soil reflectance using the proximal sensing method suffers from several problems, such as  
56 variations in view angle, illumination, soil surface roughness and exact ground position. The effectiveness of RS  
57 depends on the atmospheric conditions and the strength of the signal in the study area. The relationship between soil  
58 type and reflectance is represented by ~~five specific~~ soil spectral reflectance curves developed by Stoner and  
59 Baumgardner (1981). These curves provide important information about the presence or absence of organic matter  
60 and iron along with absorption, which indicate different soil textures.

61  
62 Over the last few decades, several studies have demonstrated that some soil characteristics can be determined using  
63 laboratory spectral analysis (Salisbury and D’Aria 1992; Chang and Laird 2002; Nanni and Demattê 2006; Minasny  
64 and McBratney 2008). Odeh and McBratney (2000) employed a multi-variate prediction model based on advanced  
65 very-high-resolution radiometer (AVHRR) to map a large area of clay. The correlations between the image data and  
66 laboratory analysis of SPOT, airborne spectroscopy and Landsat TM were used to determine different classes of soil  
67 textures (Proctor et al. 2000). The various types of soil were classified with accuracy from 50% up to 100% using these  
68 correlations. Such a poor correlation cannot be used to establish the relationship between soil texture and reflectance.  
69 Chang and Islam (2000) used multi-temporal remotely sensed brightness temperature and soil moisture map to infer  
70 the physical properties of soils. Two artificial neural networks (ANNs) were constructed based on the physical linkages  
71 among the space–time distributions of brightness temperature, soil moisture and soil media properties.

72 Apan et al. (2002) used a primary component image of the Advanced Spaceborne Thermal Emission and Reflection  
73 (ASTER) radiometer (bands 2 and 8) to determine classes of soil textures. They found that the absorption  
74 characteristics of soil can be used to differentiate quartz and clay soils on the map. Chabrilat et al. (2002) found that  
75 a short-wave with bands 5 and 6 of ASTER can detect clay soil, and the quartz index can be captured by thermal bands  
76 10–14. Other studies showed that the short and thermal waves of ASTER can detect sandy and dark clayey soils,  
77 although the results differed depending on the presence of organic substances (Salisbury and D’Aria 1992; Breunig  
78 and Galvão 2008).

79  
80 Soil reflectance is a complex phenomenon. It is difficult to predict the soil reflectance properties using physical models  
81 and theories owing to the possibility of quantitative conversion of the reflectance spectrum of the multi-mineral surface  
82 to the actual mineral abundances (Clark and Roush 1984). In addition, the theoretical results do not usually agree with  
83 reality and are not valid for the assessment of soil properties (Dewitte et al. 2012; Wulf et al. 2014). Thus, we need to  
84 establish a method that is able to reveal the complex relationships between reflectance and soil properties, especially  
85 in large areas.

86  
87 This study presents a methodology for the recognition of soil textures. This methodology integrates ANN, Geographic  
88 Information System (GIS) and RS. Artificial intelligence (AI) improved the viewpoints of digital soil mapping, and  
89 the integration of GIS helps to achieve complete area coverage. The proposed methodology is extremely useful in  
90 **large areas**, where data are scarce and have limited availability. The applicability of this method is tested to a study  
91 area located in the Western Desert of Iraq.

## 92 **2 Study Area**

93 Wadi Horan, which is one of the largest valleys in the Western Desert of Iraq, was selected as the study area. It is  
94 located in the southern part of the Euphrates River, and its geographic coordinates range from 32° 10' 44" to 34° 11'  
95 00" N (latitude) and from 39° 20' 00" to 42° 30' 00" E (longitude), as shown in Fig. 1. The total catchment area is  
96 13,370 km<sup>2</sup> (length = 362 km and width = 49.3 km). The perimeter and shape coefficients are 1,307 km and 0.13,  
97 respectively.

98  
99 **The general climate is arid, which means that the area is dry in summer and cool in winter. There is a significant**  
100 **variation in daily temperature (i.e. approximately 36°C). These conditions cause the land surface to heat up during the**  
101 **day and cool during the night, which breaks the land surface into fragments and blocks. The high annual amount of**  
102 **evaporation (3,200 mm), low average annual rainfall (115 mm) and high infiltration rate (3.25 mm/h) result in water**  
103 **scarcity in the region.**

104  
105 The study area is flat, and the elevation increases moving westward. The average topographic incline from east to  
106 west is 5 m/km, and the elevations of the highest and lowest points in the area are 987 and 77 m above sea level,

107 respectively. The main landscape is a plateau characterized by dense valleys. Some of the valleys are canyon-like with  
108 lengths of a few tens of kilometres, and others are few hundred kilometres in length.

109  
110 The major plateau of the catchment is rocky. The landform of the study area results from the complex interactions  
111 among the structure, lithology and climate. The lithologic column of the uncovered rocks in the Western Desert  
112 consists of limestone, dolomitic limestone, marl, dolomite, claystone, sandstone and phosphorite with rare gypsum  
113 (Sissakian et al. 2011). In general, the Western Desert is characterized by low rainfall, thick soil cover and the absence  
114 of vegetation. The study area includes some positive topographic features such as canyons, cliffs, depressions and  
115 major valleys. Depressions, either erosional or solution in form, are another characteristic feature. The depressions  
116 have different sizes and shapes, primarily including circular, oval and longitudinal. These features are the most  
117 important components in building water-harvesting structures.

### 118 3 Methodology

119 The steps employed to accomplish the objectives of this study were data collection, data preparation and modelling,  
120 as shown in Fig. 2. ~~The details regarding the methodology are provided in the following paragraphs.~~

121  
122 Satellite images of the study area were collected from Landsat 8 in August 2014. These images were imported into  
123 the ERDAS Imagine software for geometric correction using WGS 84/UTM zone 38 projection. Subsequently,  
124 unsupervised classification was carried out in the study area. Results from the unsupervised classification provide a  
125 good depiction of some spectral classes and categorized these classes on the basis of the ranges of the image value.  
126 Therefore, unsupervised classification is a useful task and includes the preparation of a primitive map for  
127 reconnaissance, soil survey, to identify locations for soil sampling to reduce the effort time and cost. An easily  
128 accessible flat surface consisting of bare soil and containing all types of soil with an area of  $70 \times 70 \text{ km}^2$  was selected  
129 based on unsupervised classification of the entire study area. The primitive map was produced by colour-coding each  
130 individual pixel to represent the class into which it was assigned by the classification algorithm. This map is a useful  
131 way to present the information extracted by the classification process. In addition, the use of the primitive map will  
132 reduce the error in pixel vegetation cover by more than 20% along with the errors associated with the spectral  
133 signatures urban areas, water, roads, slope, soil roughness, locations and topography for each point selected. All these  
134 specifications are recommended for accurate classification (Bartholomeus et al. 2008). Thus, the unsupervised  
135 classification is an essential step in preparing the primitive maps, conducting the soil survey and collecting the soil  
136 sample.

137  
138 In the next phase, soil sampling locations were pre-selected based on the unsupervised classification thematic map.  
139 Twenty-five sampling locations throughout the study area were selected using a GPS instrument based on certain  
140 criteria. Subsequently, the soil samples were brought to the laboratory, and sieve analysis was carried out to estimate  
141 the percentages of sand, clay and silt in each sample. The particle size analysis of a soil sample involves determining

142 percentage by weight of particles within different size ranges. The sieve analysis data were divided into training and  
143 validation sets containing 19 and 6 samples, respectively.

144

145 Subsequently, site investigations were carried out. A satellite image from Landsat 8 was used to determine the spectral  
146 reflectance of each location using ERDAS software based on the actual locations, which were determined using a GPS  
147 device. The spectral reflectance for the visible, near infrared and short wave infrared, which are represented by nine  
148 bands, were recorded for each location, whereas two thermal infrared bands were reduced.

149

150 After the laboratory work and site investigations were complete, a sensitivity analysis was carried out to examine the  
151 relationship between bands and soil texture. The results were used to develop a database for soil type based on spectral  
152 reflectance using the radial basis neural network model. The results of this model for each type of soil have been  
153 evaluated based on seven criteria [i.e. root mean square error (RMSE), normalized root mean square error (NRMSE),  
154 mean absolute error (MAE), normalized mean absolute error (NMAE), minimum absolute error, maximum absolute  
155 error and correlation coefficient ( $r$ )]. The results of the radial basis neural network were verified using the hydrologic  
156 soil group classification developed by USGS. The soil classifications were then manipulated within ArcGIS 10.2 using  
157 the spatial analyst model to generate a digital map of hydrologic soil groups for the entire study area. Figure 3  
158 summarises the methodology used in this study, including the strategies for data collection, data manipulation and  
159 modelling.

#### 160 4 Results and Discussion

161 The selection of sampling locations is based on certain criteria which have been mentioned previously in the  
162 methodology to reduce the errors associated with spectral signatures and accurately estimate soil characteristics; thus,  
163 a better unsupervised classification was performed, as shown in Fig. 4. Figure 4 shows ten classes of land cover  
164 (vegetation and different types of soil), and each class is given a specific colour. The soil texture for each position is  
165 given in detail in Table 1. The spectral reflectance was recorded for each position using ERDAS software. Nine bands  
166 were used, as shown in Table 1.

167

168 A sensitivity analysis was carried out to validate the relationship between soil type and spectral reflectance, as shown  
169 in Fig. 5. Soil type could not be detected by band 2 (wavelength (0.45–0.51)  $\mu\text{m}$ ). Band 9 (1.36–1.38  $\mu\text{m}$ ) and band 7  
170 (2.11–2.29  $\mu\text{m}$ ) were the most sensitive to soil type, particularly silt and sand, whereas clayey soil could be detected  
171 by band 6 (1.57–1.65  $\mu\text{m}$ ), band 1 (0.43–0.45  $\mu\text{m}$ ) and band 7. Unfortunately, the spectral reflectance for each range  
172 of wavelengths represented by the number of bands has a complex relationship with soil type because all these bands  
173 participate in detecting the soil texture, but in different weights because of the mineral content of that soil. Because of  
174 the variation in spectral reflectance over bands, a highly accurate model for the estimation of soil type is needed.  
175 Therefore, it is important to include all effective bands in the ANN model.

176

177 The actual values and values estimated by the ANN model are given in Fig. 6, which shows that sand had a higher  
178 percentage than silt and clay. Figure 6 also demonstrates that the values estimated for clay were more accurate than  
179 those estimated for sand and silt, and the predicted value for sandy soil was significantly different from the actual  
180 value. The overall performance of the ANN model was constant, and the total percentage of output (estimated) was  
181 100%.

182  
183 The performance of the ANN model for each type of soil was evaluated based on seven criteria, namely RMSE,  
184 NRMSE, MAE, NMAE, minimum absolute error, maximum absolute error and  $r$ . The results indicate that the  
185 estimation accuracy varied slightly among the three types of soil. The performance criteria for clay were excellent,  
186 and the correlation coefficient for clay was the highest among the three soil types (Table 2). On the basis of the values  
187 of NRMSE, NMAE and minimum absolute error, the ANN model generated less error for sand than for silt. In contrast,  
188 based on RMSE, MAE,  $r$  and maximum absolute error, the silt estimation was better than the sand estimation.

189  
190 Another way to evaluate the performance of the proposed method is through the hydrologic soil groups developed by  
191 USGS, as shown in Fig. 7. The blue and red numbers in Fig. 7 are the measured and estimated soil textures,  
192 respectively. The estimated values for all sites showed good agreement with the hydrologic soil groups of the USGS.  
193 Most of the samples were categorized as sandy loam, whereas sample 1 was categorized as loamy sand. With reference  
194 to Fig. 7, there was only a slight difference in the measured and estimated percentages of clay and sand for sample 1.  
195 However, both the measured and estimated values are located in hydrologic soil group A. These results indicate that  
196 the proposed method is reliable for predicting the soil group of a study area.

197  
198 The hydrologic soil map was developed for Wadi Horan (Fig. 8). The spectral reflectance of 120 points in different  
199 locations were predicted using the ANN model, and the percentages of soil types were determined based on the  
200 hydrologic soil classifications of the USGS. Next, the classification data were manipulated within GIS using the spatial  
201 analysis model to generate a digital map of hydrologic soil groups. Figure 8 shows the distributions of hydrologic soil  
202 types in Wadi Horan Valley.

## 203 5 Conclusions

204 The integration of ANN with GIS, RS data and survey data helps to establish a significant procedure that can be  
205 utilized for developing a digital hydrological soil group map. The relationship between spectral reflectance and soil  
206 texture was used to predict soil class. This study proposed and evaluated a method to predict a hydrologic soil group  
207 for an area by combining an ANN procedure with GIS and RS data. The effectiveness of this methodology was  
208 evaluated based on seven performance criteria. The maximum absolute errors (one of the performance criteria) were  
209 7.5, 12.8 and 14.8 for clay, silt and sand content, respectively. Clay soils produced the highest correlation coefficient  
210 (0.8565). The overall performance of this methodology was also tested using the hydrologic soil groups developed by  
211 USGS; all the samples were predicted to locate in the same hydrologic soil group determined by USGS. Therefore,

212 the proposed methodology performs well for classifying soils. It is also fast, reliable and cost-effective. In addition,  
213 this method can be used to generate a database of high quality digital maps for authorities and stake holders.

#### 214 **Author contribution**

215 K. N. Sayl collected the data, designed the methodology and perform the experiments. H. A. Afan and A. ElShafie  
216 assist in the development of artificial neural network codes. N. S. Muhammad monitors the research progress and  
217 prepared the manuscript with contributions from all co-authors.

218

#### 219 **Acknowledgement**

220 The authors would like to thank Universiti Kebangsaan Malaysia for their financial support through the Geran Galakan  
221 Penyelidik Muda, grant number GGPM-2014-046.

222

#### 223 **References**

224 Apan, A., Kelly, R., Jensen, T., Butler, D., Strong, W., and Basnet, B.: Spectral discrimination and separability  
225 analysis of agricultural crops and soil attributes using ASTER imagery, in: 11th Australasian Remote Sensing and  
226 Photogrammetry Conference, 396–411, 2002 .

227

228 Bartholomeus, H. M., Schaepman, M. E., Kooistra, L., Stevens, A., Hoogmoed, W. B., and Spaargaren, O. S. P.:  
229 Spectral reflectance based indices for soil organic carbon quantification, *Geoderma*, 145, 28–36, doi:  
230 10.1016/j.geoderma.2008.01.010, 2008.

231

232 Breunig, F., Galvão, L., Formaggio, A. R.: Detection of sandy soil surfaces using ASTER-derived reflectance,  
233 emissivity and elevation data: potential for the identification of land degradation, *Int. J. Remote Sens.*, 29, 1833–1840,  
234 2008.

235

236 Chabrilat, S., Goetz, A., Krosley, L., and Olsen, H.: Use of hyperspectral images in the identification and mapping  
237 of expansive clay soils and the role of spatial resolution, *Remote Sens. Environ.*, 82, 431–445, 2002.

238

239 Chang, C., and Laird, D.: Near-infrared reflectance spectroscopic analysis of soil C and N, *Soil Sci.*, 167, 110–116,  
240 2002.

241

242 Chang, D. H., and Islam, S.: Estimation of soil physical properties using remote sensing and artificial neural network,  
243 *Remote Sens. Environ.*, 74, 534–544, doi: 10.1016/s0034-4257(00)00144-9, 2000.

244  
245 Clark, R., and Roush, T.: Reflectance spectroscopy: Quantitative analysis techniques for remote sensing applications,  
246 J. Geophys. Res.-Sol. Ea., 89, 6329–6340, 1984.  
247  
248 De Winnaar, G., Jewitt, G., and Horan, M.: A GIS-based approach for identifying potential runoff harvesting sites in  
249 the Thukela River basin, South Africa, Phys. Chem. Earth Pt. A/B/C, 32, 1058–1067, 2007.  
250 Dewitte, O., Jones, A., Elbelrhiti, H., Horion, S., and Montanarella, L.: Satellite remote sensing for soil mapping in  
251 Africa: An overview, Prog. Phys. Geog., 0309133312446981, 2012.  
252  
253 Elewa, H. H., and Qaddah, A. A.: Groundwater potentiality mapping in the Sinai Peninsula, Egypt, using remote  
254 sensing and GIS-watershed-based modeling. Hydrogeol. J., 19, 613–628, doi: 10.1007/s10040-011-0703-8, 2011.  
255  
256 Jasrotia, A. S., Majhi, A., and Singh, S.: Water balance approach for rainwater harvesting using remote sensing and  
257 GIS techniques, Jammu Himalaya, India. Water Resour. Manag., 23, 3035–3055, doi: 10.1007/s11269-009-9422-5,  
258 2000.  
259  
260 King, C., Baghdadi, N., Lecomte, V., and Cerdan, O.: The application of remote-sensing data to monitoring and  
261 modelling of soil erosion, Catena, 62, 79–93, 2005.  
262  
263 Lacoste, M., Minasny, B., McBratney, A., Michot, D., Viaud, V., and Walter, C.: High resolution 3D mapping of soil  
264 organic carbon in a heterogeneous agricultural landscape, Geoderma, 213, 296–311, 2014.  
265  
266 Martin, M., Orton, T., Lacarce, E., Meersmans, J., Saby, N. P. A., Paroissien, J. B., Jolivet, C., Boulonne, L., and  
267 Arrouays, D.: Evaluation of modelling approaches for predicting the spatial distribution of soil organic carbon stocks  
268 at the national scale, Geoderma, 223, 97–107, 2014.  
269  
270 Minasny, B., and McBratney, A.: Regression rules as a tool for predicting soil properties from infrared reflectance  
271 spectroscopy, Chemometr. Intell. Lab., 94, 72–79, 2008.  
272  
273 Nanni, M., and Demattê, J.: Spectral reflectance methodology in comparison to traditional soil analysis, Soil Sci. Soc.  
274 Am. J., 70, 393–407, 2006.  
275  
276 Neitsch, S., Arnold, J., Kiniry, J., and Williams, J.: Soil & water assessment tool theoretical documentation version  
277 2009. Texas Water. Resour. Inst., 1–647, 2011.  
278  
279 Odeh, I., and McBratney, A.: Using AVHRR images for spatial prediction of clay content in the lower Namoi Valley  
280 of eastern Australia, Geoderma, 97, 237–254, 2000.



281  
282 Proctor, C., Baker, A., Barnes, W., and Gilmour, M.: A thousand year speleothem proxy record of North Atlantic  
283 climate from Scotland, *Clim. Dynam.*, 16, 815–820, 2000.  
284  
285 Salisbury, J., and D’Aria, D.: Infrared (8–14  $\mu\text{m}$ ) remote sensing of soil particle size, *Remote Sens. Environ.*, 42, 157–  
286 165, 1992.  
287 Senay, G., and Verdin, J.: Developing index maps of water-harvest potential in Africa, *Appl. Eng. Agric.*, 20, 789,  
288 2004.  
289  
290 Sims, D., and Gamon, J.: Relationships between leaf pigment content and spectral reflectance across a wide range of  
291 species, leaf structures and developmental stages, *Remote Sens. Environ.*, 81, 337–354, 2002.  
292  
293 Sissakian, V., Ahad, A., and Hamid, A.: Geological hazards in Iraq, classification and geographical distribution, *Iraqi*  
294 *Bulletin of Geology and Mining*, 7, 1–28, 2011.  
295  
296 Stoner, E., and Baumgardner, M.: Characteristic variations in reflectance of surface soils, *Soil Sci. Soc. Am. J.*, 45,  
297 1161–1165, 1981.  
298  
299 Tyagi, J., Mishra, S., Singh, R., and Singh, V.: SCS-CN based time-distributed sediment yield model, *J. Hydrol.*, 352,  
300 388–403, 2008.  
301  
302 Wang, X., Williams, J. R., Gassman, P. W., Baffaut, C., Izaurrealde, R. C., Jeong, J., and Kiniry, J. R.: EPIC and  
303 APEX: Model use, calibration, and validation, *Trans. ASABE*, 55, 1447–1462, doi: 10.13031/2013.42253, 2012.  
304  
305 Wulf, H., Mulder, T., Schaeppman, M., Keller, A., and Jörg, P.: Remote sensing of soils, Zurich, Switzerland, 71, 2014.  
306  
307 Young, R., Onstad, C., Bosch, D., and Anderson, W.: AGNPS, Agricultural Non-Point-Source Pollution Model: a  
308 watershed analysis tool. Research report, Agricultural Research Service, Albany, CA (USA). Western Utilization  
309 Research and Development Div., 1987.  
310

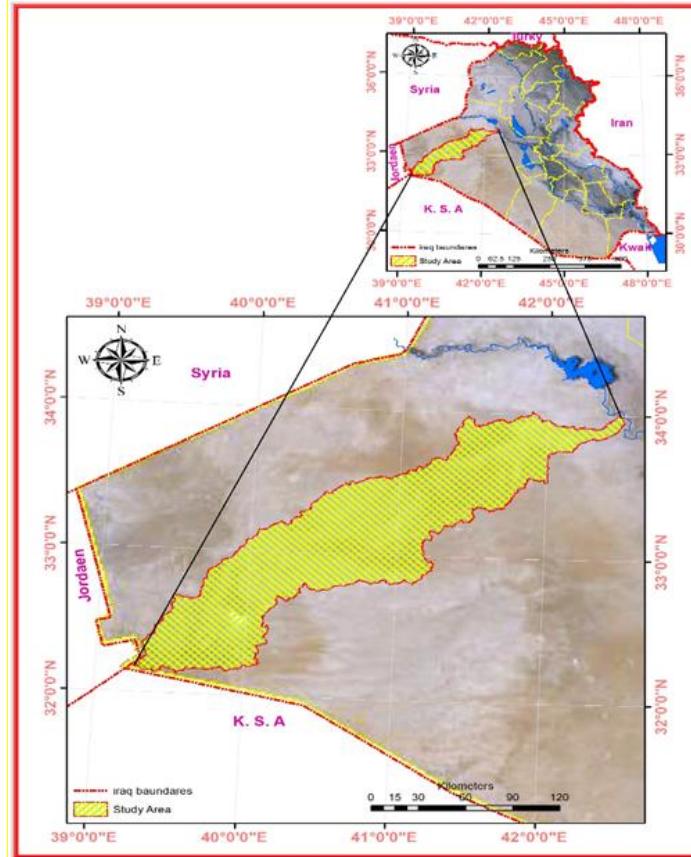

Figure 1: Map of the study area

311  
312  
313  
314  
315

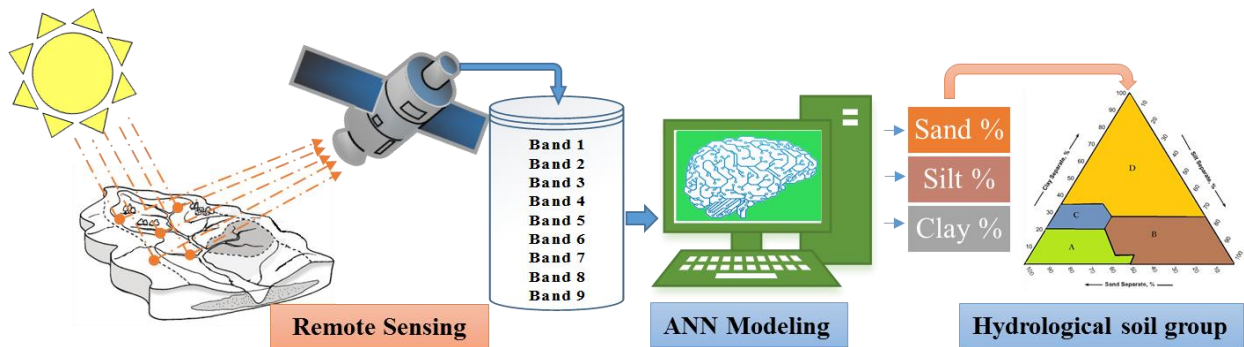

Figure 2: Schematic showing the study methodology

316  
317  
318

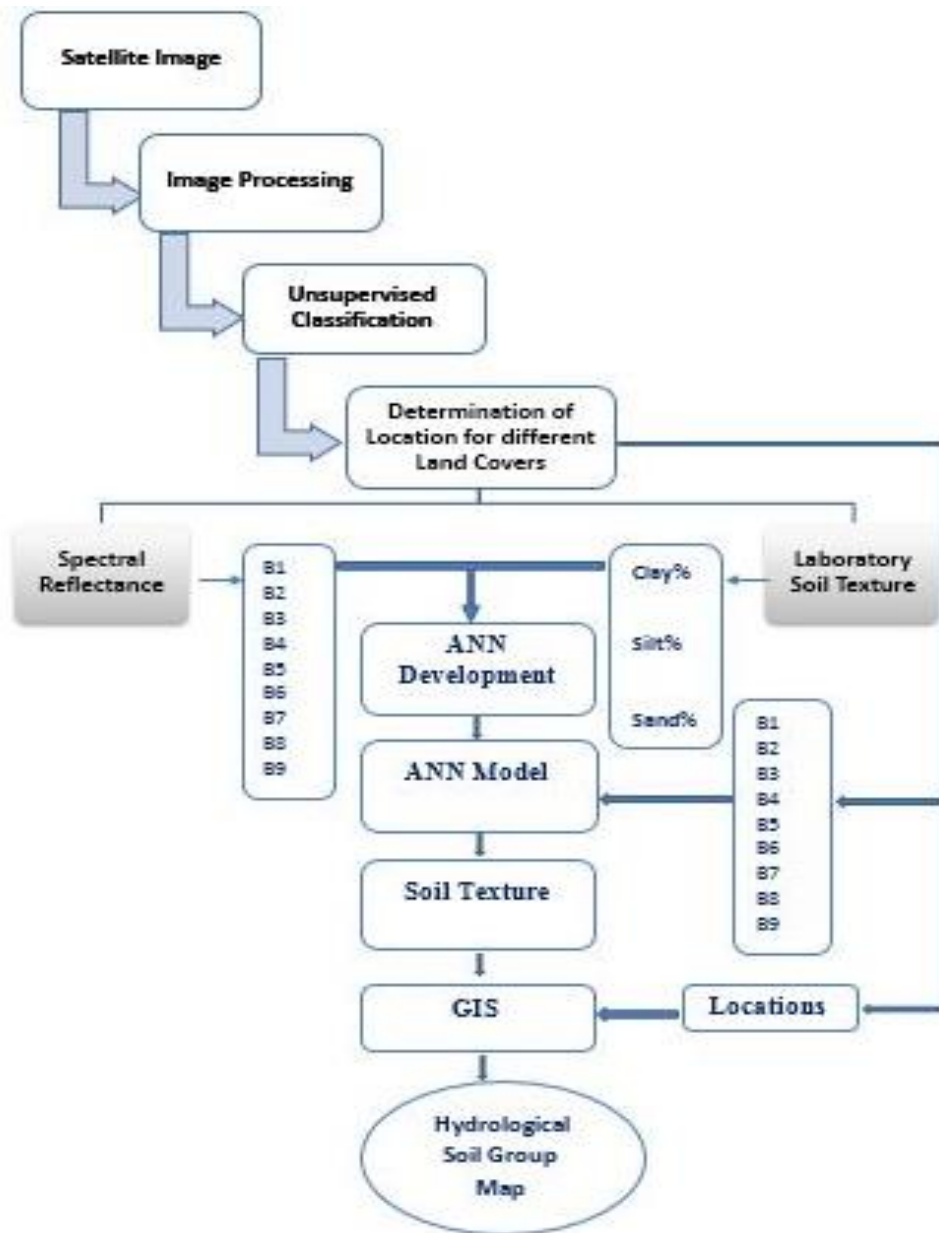

319

Figure 3: Flowchart showing the proposed methodology

320

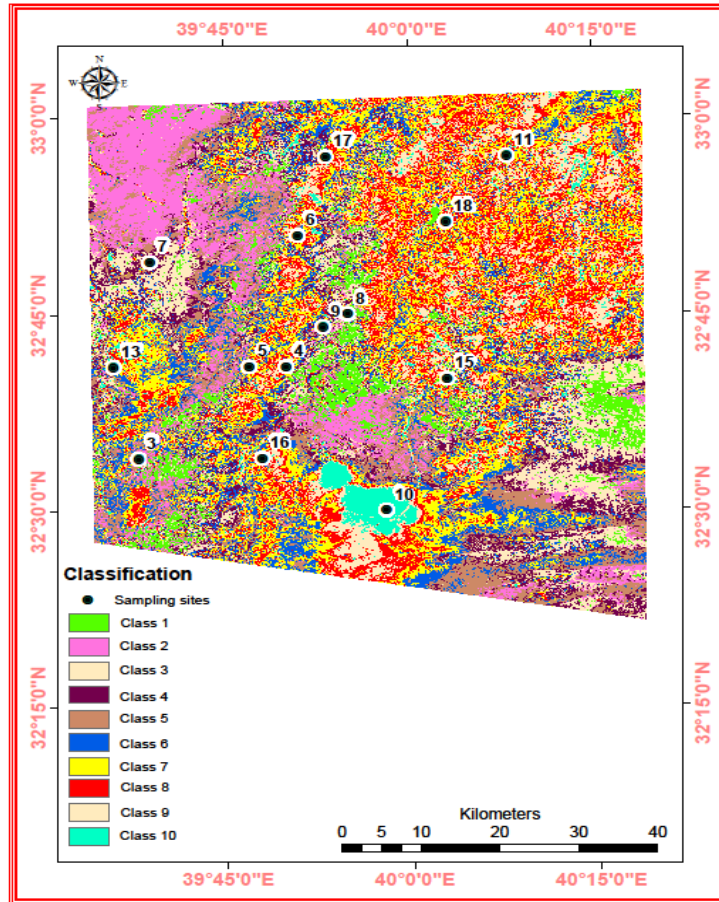

Figure 4: Soil classes of unsupervised classification with samples locations

321  
322  
323

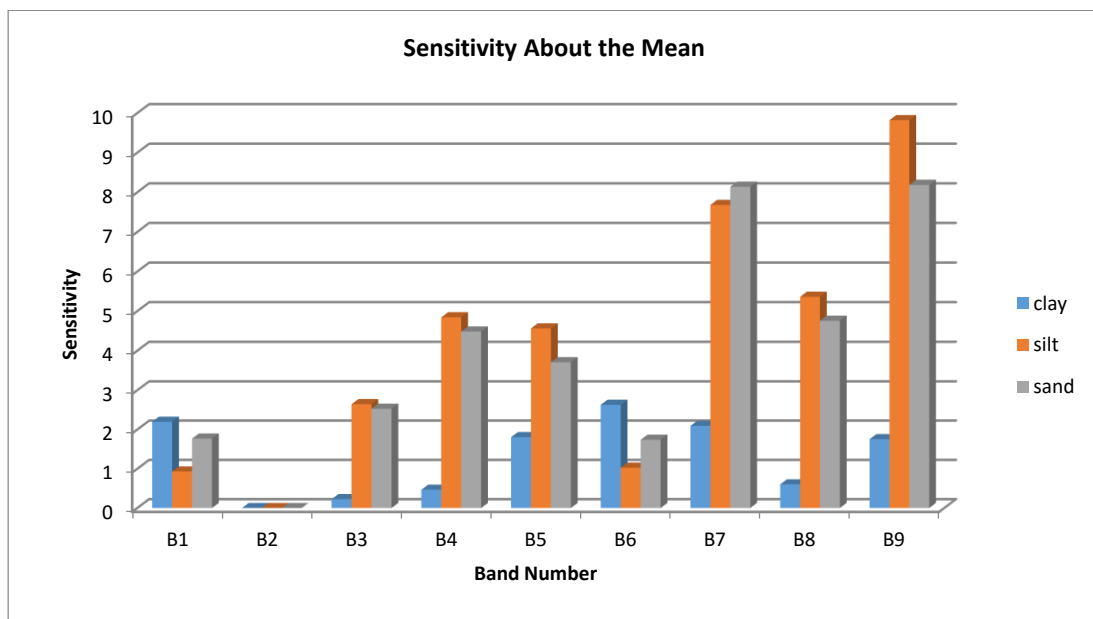

Figure 5: Sensitivities of bands for different soil types

324  
325

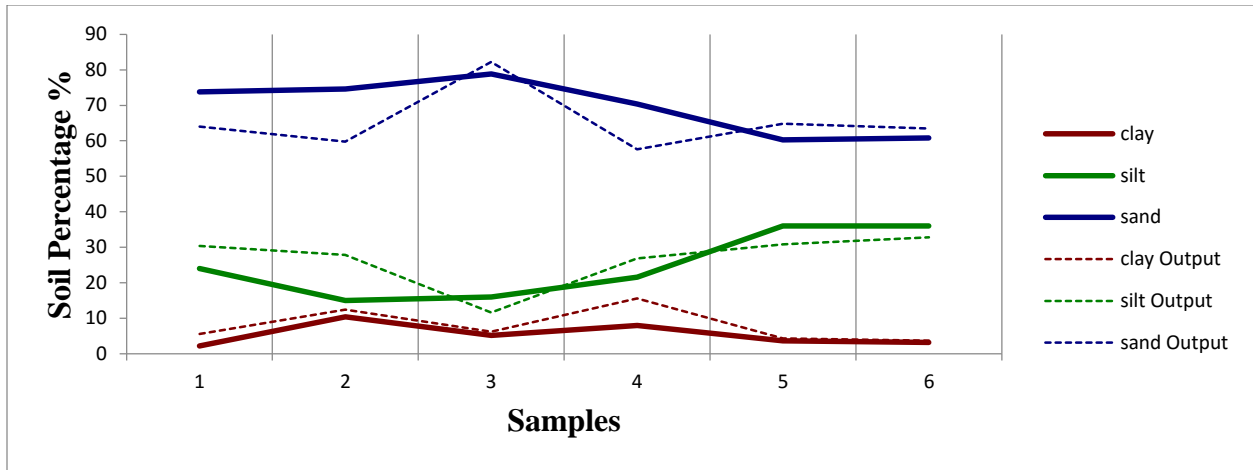

Figure 6: Actual and estimated values of clay, silt, and sand for the tested samples

326  
327  
328  
329

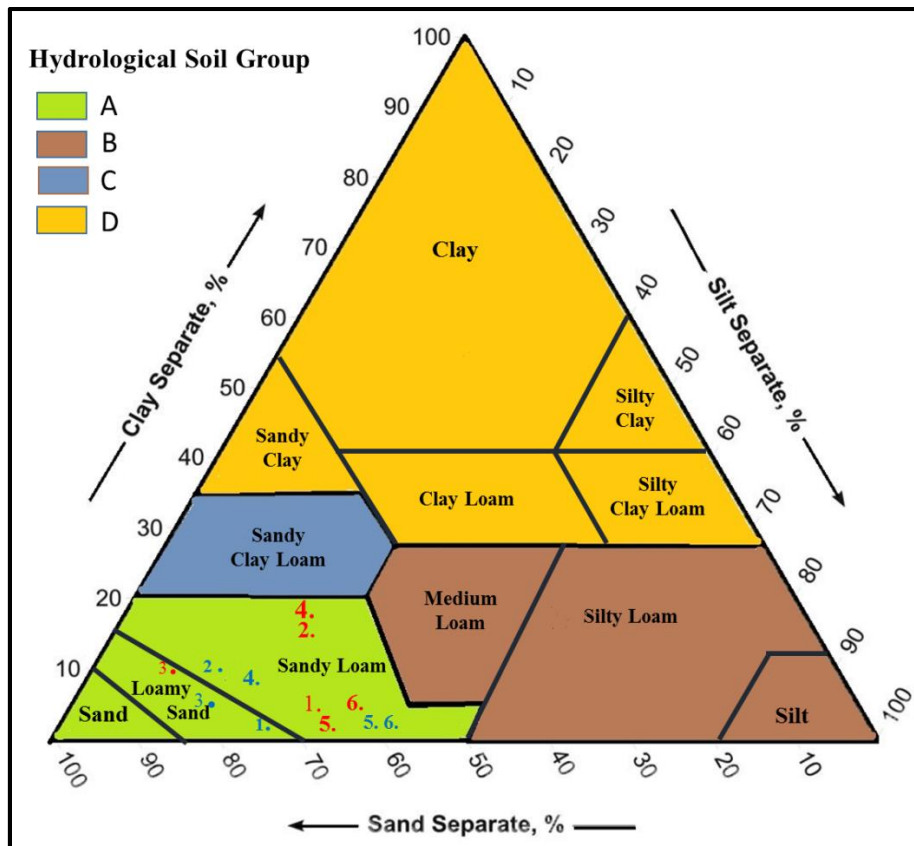

Figure 7: Representations of actual and estimated points on the zones of the hydrologic soil group and the triangle of soil texture

330  
331  
332  
333

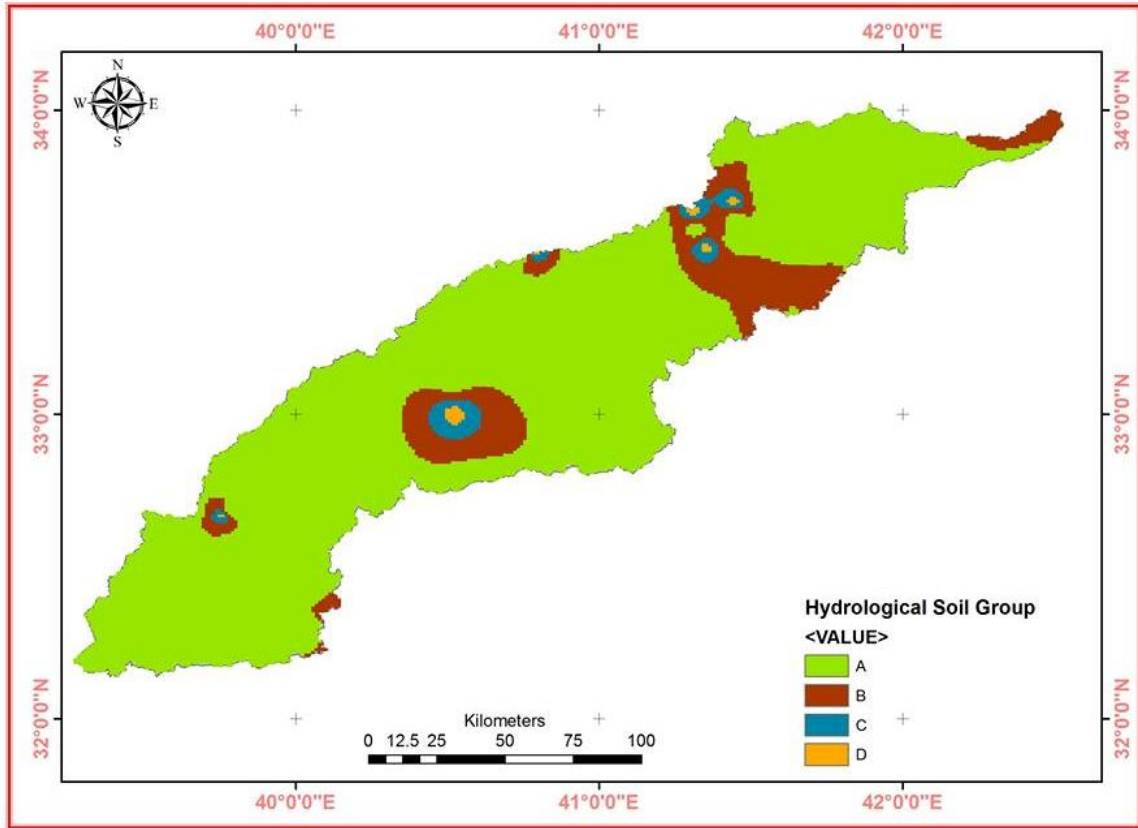

334

335 **Figure 8: Hydrologic soil group in the Wadi Horan Valley classified using the multiple-output artificial neural network**  
 336 **model integrated with the geographic information system, remote sensing and survey data**

337

338

339

340

341

342

343

344

345

346

347

348

349

350

351

**Table 1: Band number and results of sieve analysis for each point**

| Point | Band 1 | Band 2 | Band 3 | Band 4 | Band 5 | Band 6 | Band 7 | Band 8 | Band 9 | Clay % | silt % | Sand % |
|-------|--------|--------|--------|--------|--------|--------|--------|--------|--------|--------|--------|--------|
| P1    | 12664  | 12574  | 13864  | 18241  | 22641  | 26704  | 22598  | 15346  | 5106   | 31.2   | 21.2   | 47.6   |
| P2    | 12574  | 12498  | 13710  | 17721  | 21705  | 25666  | 21869  | 15103  | 5116   | 2.2    | 24.0   | 73.8   |
| P3    | 12936  | 12922  | 14485  | 18556  | 23386  | 27961  | 22736  | 15663  | 5094   | 10.4   | 15.0   | 74.6   |
| P4    | 13539  | 13839  | 16268  | 20959  | 25781  | 29141  | 23980  | 17721  | 5083   | 2.0    | 34.0   | 64.0   |
| P5    | 12897  | 12994  | 14743  | 19051  | 23350  | 26839  | 22378  | 16230  | 5080   | 2.6    | 23.0   | 74.4   |
| P6    | 13391  | 13626  | 15738  | 20259  | 24631  | 27881  | 23255  | 17193  | 5091   | 5.2    | 16.0   | 78.8   |
| P7    | 12909  | 12934  | 14478  | 18724  | 22853  | 25930  | 21894  | 15947  | 5079   | 1.0    | 7.6    | 91.4   |
| P8    | 12823  | 12866  | 14447  | 18179  | 22107  | 25529  | 20955  | 15423  | 5080   | 4.0    | 27.2   | 68.8   |
| P9    | 12802  | 12871  | 14446  | 18185  | 22275  | 25927  | 21041  | 15586  | 5108   | 8.0    | 21.6   | 70.4   |
| P10   | 15698  | 16683  | 20553  | 25715  | 30665  | 33089  | 27247  | 22258  | 5096   | 1.2    | 18.0   | 80.8   |
| P11   | 13208  | 13507  | 15929  | 20507  | 24550  | 27072  | 23370  | 17575  | 5093   | 7.2    | 8.0    | 84.8   |
| P12   | 12942  | 12924  | 14460  | 18642  | 22693  | 25803  | 21886  | 15917  | 5117   | 1.2    | 32.0   | 66.8   |
| P13   | 13163  | 13312  | 15123  | 19358  | 23521  | 26904  | 22438  | 16449  | 5112   | 3.7    | 36.0   | 60.3   |
| P14   | 13576  | 13799  | 16088  | 20704  | 25507  | 29300  | 24366  | 17540  | 5090   | 0.0    | 14.0   | 86.0   |
| P15   | 13127  | 13308  | 15479  | 19675  | 23761  | 26989  | 22313  | 16779  | 5085   | 4.0    | 39.2   | 56.8   |
| P16   | 13330  | 13551  | 15869  | 20805  | 25856  | 30040  | 24993  | 17481  | 5091   | 0.6    | 19.0   | 80.4   |
| P17   | 13227  | 13391  | 15504  | 19844  | 23964  | 26833  | 22087  | 16931  | 5086   | 3.2    | 36.0   | 60.8   |
| P18   | 13063  | 13290  | 15531  | 19598  | 23371  | 26544  | 22183  | 16370  | 5083   | 3.2    | 24.0   | 72.8   |
| P19   | 12664  | 12574  | 13864  | 18241  | 22641  | 26704  | 22598  | 15346  | 5106   | 50.2   | 1.5    | 48.3   |
| P20   | 12574  | 12498  | 13710  | 17721  | 21705  | 25666  | 21869  | 15103  | 5116   | 3.6    | 0.1    | 96.3   |
| P21   | 12936  | 12922  | 14485  | 18556  | 23386  | 27961  | 22736  | 15663  | 5094   | 32.0   | 1.6    | 66.4   |
| P22   | 13539  | 13839  | 16268  | 20959  | 25781  | 29141  | 23980  | 17721  | 5083   | 20.5   | 11.1   | 68.4   |
| P23   | 12897  | 12994  | 14743  | 19051  | 23350  | 26839  | 22378  | 16230  | 5080   | 33.5   | 0.8    | 65.7   |
| P24   | 13391  | 13626  | 15738  | 20259  | 24631  | 27881  | 23255  | 17193  | 5091   | 17.0   | 1.0    | 82.0   |
| P25   | 12909  | 12934  | 14478  | 18724  | 22853  | 25930  | 21894  | 15947  | 5079   | 31.2   | 1.1    | 67.7   |

352

353

354

355

356

357

358

359

**Table 2: Evaluation of the ANN model for each type of soil based on performance criteria**

| <b>Performance criteria</b> | <b>clay</b> | <b>silt</b> | <b>sand</b> |
|-----------------------------|-------------|-------------|-------------|
| RMSE                        | 3.5221      | 6.9521      | 9.3021      |
| NRMSE                       | 0.1128      | 0.2201      | 0.212       |
| MAE                         | 2.5264      | 6.2112      | 7.9995      |
| NMAE                        | 0.0809      | 0.1965      | 0.1826      |
| Min Abs Error               | 0.5295      | 3.2202      | 2.6906      |
| Max Abs Error               | 7.5674      | 12.8539     | 14.8565     |
| <i>r</i>                    | 0.8565      | 0.6471      | 0.4102      |

360
